1 **A helicase-containing module defines a family of pCD630-like**  
2 **plasmids in *Clostridium difficile***

3

4 Wiep Klaas Smits<sup>1,2,\*</sup>, J. Scott Weese<sup>3</sup>, Adam P. Roberts<sup>4,5</sup>,

5 Céline Harmanus<sup>1</sup>, Bastian Hornung<sup>1</sup>

6

7 <sup>1</sup> Department of Medical Microbiology, Leiden University Medical Center, PO Box 9600,  
8 2300RC, Leiden, The Netherlands

9 <sup>2</sup> Netherlands Centre for One Health

10 <sup>3</sup> Department of Pathobiology, Ontario Veterinary College, University of Guelph, Guelph,  
11 Ontario, Canada

12 <sup>4</sup> Department of Parasitology, Liverpool School of Tropical Medicine, Liverpool, United  
13 Kingdom

14 <sup>5</sup> Research Centre for Drugs and Diagnostics, Liverpool School of Tropical Medicine,  
15 Liverpool, United Kingdom

16

17 **Running title:** pCD630 plasmids in *C. difficile*

18

19 \* Corresponding author: Department of Medical Microbiology, Leiden University Medical  
20 Center, PO Box 9600, 2300RC, Leiden, The Netherlands

21 phone: +31-71-526 1229

22 fax: +31-71-526 6761

23 E-mail: [w.k.smits@lumc.nl](mailto:w.k.smits@lumc.nl)

24

25 **Abstract**

26 *Clostridium difficile* is a Gram-positive and sporulating enteropathogen that is a major  
27 cause of healthcare-associated infections. Even though a large number of genomes of  
28 this species have been sequenced, only a few plasmids have been described in the  
29 literature. Here, we use a combination of *in silico* analyses and laboratory experiments  
30 to show that plasmids are common in *C. difficile*. We focus on a group of plasmids that  
31 share similarity with the plasmid pCD630, from the reference strain 630. The family of  
32 pCD630-like plasmids is defined by the presence of a conserved putative helicase that  
33 is likely part of the plasmid replicon. This replicon is compatible with at least some other  
34 *C. difficile* replicons, as strains can carry pCD630-like plasmids in addition to other  
35 plasmids. We find two distinct sub-groups of pCD630-like plasmids that differ in size  
36 and accessory modules. This study is the first to describe a family of plasmids in *C.*  
37 *difficile*.

38

39 **Keywords:** Plasmid, replicon, helicase, replication

40

41

42

43

## 44 Introduction

45

46 *Clostridium difficile* (*Clostridioides difficile* [1]) is a Gram-positive, anaerobic and spore-  
47 forming bacterium that can asymptotically colonize the human gut [2]. It is ubiquitous  
48 in the environment, and can also be found in the gastrointestinal tract of many animals.  
49 The bacterium gained notoriety when it was identified as the causative agent of health  
50 care associated diarrhea, and is increasingly implicated in community-associated  
51 disease in many countries [2]. In hosts with a dysbiosis of the microbiome, such as  
52 patients treated with broad-spectrum antimicrobials, conditions are favorable for *C.*  
53 *difficile* germination and outgrowth [3]. *C. difficile* produces one or more toxins, that  
54 cause symptoms ranging from diarrhea to potentially fatal toxic megacolon [2, 4].

55 Over the past two decades, genetic studies have of *C. difficile* have become  
56 possible due to the generation of shuttle plasmids that can be transferred by  
57 conjugation from *Escherichia coli* to *C. difficile* [5]. These plasmids mostly employ a  
58 replicon derived from plasmid pCD6 for replication in *C. difficile* [6]. In 2006, the first  
59 genome sequence of *C. difficile* became available, revealing the presence of another  
60 plasmid, pCD630 [7].

61 Despite a great number of strains having been whole genome sequenced since  
62 then, plasmid biology of *C. difficile* has been poorly explored. One reason is that  
63 plasmid content is variable, and most studies on the evolution and/or transmission of *C.*  
64 *difficile* focus on those genes conserved between all strains (the core genome) [8-11].  
65 However, there is reason to assume that plasmids are common in *C. difficile*; for  
66 instance, before the advent of the currently common typing schemes [12], plasmid

67 isolation had been proposed as an epidemiological tool [13]. The ratio of plasmid-  
68 containing to plasmid-free strains in this study was found to be approximately 1:2,  
69 suggesting that around 30% of strains of *C. difficile* may carry a plasmid. Furthermore,  
70 hybridization-based analyses of total DNA from a collection of *C. difficile* strains suggest  
71 the presence of DNA with significant similarity to pCD630 open reading frames (ORFs)  
72 [14, 15].

73 Here, we define a family of plasmids that share a conserved helicase-containing  
74 module and demonstrate that these plasmids are common in a diverse set of *C. difficile*  
75 strains.

76

## 77 **Materials and methods**

78

### 79 *Strains and growth conditions*

80 Strains used in this study are listed in **Table 1**. For DNA isolation, strains were grown on  
81 *Clostridium difficile* agar (CLO) plates (bioMérieux) and a single colony was inoculated  
82 into pre-reduced brain-heart infusion broth (Oxoid) supplemented with 0.5 % w/v yeast  
83 extract (Sigma-Aldrich) and *Clostridium difficile* selective supplement (Oxoid). Strains  
84 were PCR ribotyped [16] in-house for this study. For some strains a PCR ribotype could  
85 not be assigned (**Table 1**).

86

### 87 *Isolation of plasmid DNA from C. difficile*

88 Plasmids were isolated from 2 mL of *C. difficile* overnight culture using NucleoSpin  
89 Plasmid Easypure columns (Macherey-Nagel); to increase yield, 10mg/mL lysozyme to

90 buffer A1 was added, as recommended by the manufacturer. Using PCR and  
91 sequencing, we found that the DNA isolated using this kit is heavily contaminated with  
92 chromosomal DNA. To isolate pure plasmid DNA, aliquots of the DNA were incubated  
93 with PlasmidSafe ATP-dependent DNase (Epicentre) that digests linear, but not circular  
94 double stranded DNA. After purification with a Nucleospin Gel and PCR Clean-up kit  
95 (Macherey-Nagel), the absence of genomic DNA was confirmed by PCR using primers  
96 targeting *gluD* (**Table 2**). Yields were generally very low, but the plasmid was readily  
97 detectable by PCR.

98

#### 99 *Reannotation of pCD630 and identification of a pCD630-like plasmid*

100 The pCD630 sequence was obtained from GenBank (AM180356.1). CDP01 and  
101 CDP11 form a single open reading frame (ORF) and were treated as a single ORF in  
102 our analyses. Protein sequences encoded by the ORFs of pCD630 were used as  
103 BLAST queries against the non-redundant protein sequences database, limited to  
104 taxid:1496 (*Clostridium difficile*). This identified the 8089 bp *Peptoclostridium difficile*  
105 genome assembly 7032985, scaffold BN1096\_Contig\_85 (LK932541.1). To reconstitute  
106 the plasmid from this contig, the DNA was circularized and a single copy of the 98 bp  
107 direct repeat that was present at the terminus of the original contig was removed using  
108 Geneious R10. The resulting 7991 bp sequence now encodes a full copy of a sequence  
109 homologous to CDP07 of pCD630. Reannotation of plasmids was performed using  
110 using an in-house pipeline. This pipeline incorporates the gene caller Prodigal (version  
111 2.6.3) [17], RNAmmer (version 1.2) [18], Aragorn (version 1.2.38) [19], the CRISPR  
112 recognition tool (version 1.2) [20], dbCAN (version 5.0) [21] and PRIAM (version March

113 2015) [22]. The plasmid derived from LK932541 was submitted to GenBank as pCD-  
114 ISS1 (GenBank: MG266000).

115

### 116 *Identification of pCD630-like plasmids in short read archives*

117 In order to identify other pCD630-like plasmids in sequence databases, paired end  
118 Illumina sequences from study PRJEB2101 (ERR017367-ERR017371, ERR022513,  
119 ERR125908-ERR125911) were downloaded from the short read archive of the  
120 European Nucleotide Archive (ENA). Short reads were assembled and visualized in  
121 PLACNETw [23] to determine likely replicons. The contigs corresponding to pCD630-  
122 like plasmids were downloaded and imported into Geneious R10 software (Biomatters  
123 Ltd) for circularization and removal of terminal repeats; afterwards all plasmids which  
124 could be circularized were compared with BLASTN (version 2.40) [24] to pCD630 and  
125 the sequences were restructured to start at the base corresponding to base 2903 in  
126 pCD630. Afterwards the plasmids were annotated using the in-house pipeline as  
127 described above, and submitted to GenBank as pCD-WTSI1 (GenBank: MG019959),  
128 pCD-WTSI2 (GenBank: MG019960), pCD-WTSI3 (GenBank: MG019961), pCD-WTSI4  
129 (GenBank: MG019962). Alignments of the pCD630-like plasmids were performed in  
130 Geneious R10 (Biomatters Ltd) and the alignment figure was prepared using Adobe  
131 Illustrator CC (Adobe Systems Inc).

132

### 133 *Polymerase chain reaction*

134 Oligonucleotides used in this work are listed in **Table 2**. To confirm the presence of  
135 pCD630 in derivatives of *C. difficile* strain 630, PCR was performed with oWKS-1629

136 and oWKS-1630 (targeting CDP04); oWKS-1631 and oWKS-1632 (targeting CDP07);  
137 oWKS-1633 and oWKS-1634 (targeting CDP10). As a control for chromosomal DNA, a  
138 PCR was performed targeting the *gluD* gene that is used as a target for *C. difficile*  
139 identification, using primers oWKS-1070 and oWKS-1071. To screen a collection of *C.*  
140 *difficile* strains for the presence of pCD630-like plasmids, a PCR was performed with  
141 primers oWKS-1651 and oWKS-1652 that targets a region of CDP07 conserved among  
142 the 6 full length plasmids identified in this work. Fragments were separated on 0.5x  
143 TAE (20 mM Tris, 10mM acetic acid, 0.5mM EDTA) agarose, stained with ethidium  
144 bromide and imaged on a Gel Doc XR system (BioRad). Images were captured using  
145 QuantityOne (BioRad) and prepared for publication using Adobe Photoshop CC (Adobe  
146 Systems Inc) and CorelDRAW X8 (Corel Corporation).

147

## 148 **Results and discussion**

149

### 150 *pCD630 is present in C. difficile strain 630 and some of its derivatives*

151 The most commonly used laboratory strains of *C. difficile* are derived from the reference  
152 strain 630 (PCR ribotype 012 [7]) by serial passaging and screening for loss of  
153 resistance to the antimicrobial erythromycin [25]). It was generally assumed that during  
154 this passaging the plasmid pCD630 that is present in strain 630 was lost. Indeed, our *de*  
155 *novo* assembly of the 630 $\Delta$ *erm* genome sequence using single molecule real-time  
156 (SMRT) sequencing did not report the presence of the plasmid [26]. Recently, however,  
157 one study showed the presence of reads mapping to pCD630 in a genome  
158 resequencing project of another isolate of 630 $\Delta$ *erm* [27]. This prompted us to revisit our

159 whole genome sequencing data (ENA:PRJEB7326). If the plasmid was maintained in  
160 630 $\Delta$ *erm*, we expected to be able to find reads mapping back to the pCD630 reference  
161 sequence (GenBank: AM180356.1) in this dataset. Indeed, when we performed a  
162 reference assembly of the short reads (ENA: ERR609091) against the pCD630, we  
163 found approximately 0.8% of the reads mapping to the plasmid. The original *de novo*  
164 assembly overlooked the plasmid due to a low number of plasmid-mapping reads as the  
165 result of a size fractionation step (the plasmid is <8kb, and SMRT sequencing was  
166 performed on high MW DNA). Notably, both a *de novo* assembly of the plasmid based  
167 on a small number of SMRT reads, as well as the reference assembly using a large  
168 number of Illumina reads shows a 100% congruence with the published reference  
169 sequence for pCD630 (data not shown). This indicates that, despite the lack of selective  
170 pressure and repeated culturing under laboratory conditions, the plasmid has remained  
171 unchanged.

172 We confirmed the presence of pCD630 and the extrachromosomal nature of the  
173 plasmid. To do so, we performed a miniprep on a *C. difficile* liquid culture and treated  
174 the resulting DNA with PlasmidSafe DNase, that selectively removes linear double  
175 stranded (sheared) but not circular DNA. A PCR using primers against three ORFs of  
176 pCD630 (*cdp04*, *cdp07* and *cdp10*) and one chromosomal locus (*gluD*) showed that the  
177 DNase treated samples were negative for the *gluD* PCR, but positive for all three  
178 plasmid loci (**Figure 1A**).

179 The results above suggest that pCD630 is stably maintained  
180 extrachromosomally. Next, we wanted to verify the presence of the plasmid in multiple  
181 derivatives of strain 630, to see if plasmid-loss could be documented. We previously



182 analyzed 630 $\Delta$ *erm* from our laboratory as well as from the laboratory where it was  
183 generated to determine the chromosomal location of the mobile element CTn5, in  
184 comparison with the ancestral strain 630 and the independently derived 630E strain  
185 [26]. We found that pCD630 was readily detected on total genomic DNA from all these  
186 strains, with the exception of the 630E isolate in our collection (**Figure 1B**). 630E and  
187 630 $\Delta$ *erm* demonstrate notable phenotypic differences [25, 28] and we wondered  
188 whether these might be in part due to loss of the pCD630 plasmid. We performed a  
189 reference assembly using the whole genome sequencing data available from the study  
190 by Collery *et al* (ENA: PRJNA304508), that compares 630 $\Delta$ *erm* and 630E [28]. The  
191 assembly showed that both these strains contain pCD630 and indicate that the loss of  
192 plasmid is not a general feature of 630E strains. We conclude that the observed  
193 phenotypic differences are not likely due to loss of the plasmid. It was reported that the  
194 isolate of *C. difficile* 630 stored at in the collection of the DSMZ ([www.dsmz.de](http://www.dsmz.de)) lacks  
195 the pCD630 plasmid [27, 29]. We requested both 630 (DSMZ 26845) and 630 $\Delta$ *erm*  
196 (DSMZ 27543) and checked for the presence of the plasmid. Our results confirm the  
197 absence of pCD630 from DSMZ 26485 (**Figure 1B**), in line with the analysis of  
198 Dannheim *et al* [27].

199 In other organisms, the presence of certain replicons can negatively affect the  
200 maintenance of other replicons (plasmid incompatibility); this has not been documented  
201 for *C. difficile* to date. If pCD630 would be incompatible with other replicons (such as the  
202 pCB102 and pCD6) [5, 30], this could result in loss of the pCD630 plasmid in genetically  
203 modified *C. difficile*. We therefore tested whether pCD630 was lost in strains  
204 chromosomally modified using Clostron mutagenesis [30, 31], Allele Coupled Exchange

205 [32, 33] or carrying a replicative plasmid [34, 35]. We found that all of these carried  
206 pCD630, suggesting that pCD630 is compatible with pCB102 and pCD6-based  
207 replicons (**Figure 1C**). Similar results were obtained with multiple mutants (data not  
208 shown).

209         Together, our data clearly shows that pCD630 persists in the absence of  
210 selection, but also that pCD630 can be lost. Thus, care should be taken to verify  
211 plasmid content when comparing presumed isogenic laboratory strains even when they  
212 are derived from the same isolate.

213

214 *A pCD630-like plasmid is present in a strain with reduced metronidazole susceptibility*

215 We wondered whether there are more pCD630-like plasmids. As a first step, we set out  
216 to identify coding sequences with homology to pCD630 ORFs in GenBank. Using  
217 default settings, we identified a single 8089 bp contig that encodes proteins with  
218 homology to CDP01, CDP04-6 and CDP08-11 (*Peptoclostridium difficile* genome  
219 assembly 7032985, scaffold BN1096\_Contig\_85; GenBank: LK932541) (**Figure 2**).

220         This sequence stems from a study that compares three non-toxicogenic PCR  
221 ribotype 010 strains of *C. difficile*, with differing susceptibility to metronidazole [36].  
222 Strain 7032985 was classified as intermediate resistant to metronidazole. If we assume  
223 that the contig represents a pCD630-like plasmid, we expect DNA from this strain to  
224 remain positive in a PCR that targets the plasmid upon treatment with PlasmidSafe  
225 DNase. We found that the PCR targeting *cdp07*, but not chromosomal locus *gluD*,  
226 results in a clear signal when using a template treated with PlasmidSafe DNase (**Figure**

227 **1D)**. Having confirmed that the contig is extrachromosomal in nature, we will refer to the  
228 putative plasmid as pCD-ISS1 hereafter (**Table 3**).

229 To further analyze pCD-ISS1, we circularized the LK932451 contig to yield a  
230 putative plasmid of 7991bp, performed an automated annotation (GenBank:  
231 MG266000) and compared the annotated pCD-ISS1 sequence to that of pCD630  
232 (**Figure 2**). Overall, the two plasmids are highly similar. Of note, the ORF that  
233 corresponds to the DEAD/DEAH helicase like protein (CDP07 in pCD630) was not  
234 annotated in the LK932541 contig due to its linear nature, but is evident in the pCD-  
235 ISS1 sequence. Similarly, we found that CDP1 (gene remnant) and CDP11 (doubtful  
236 CDS) of pCD630 are in fact a single 201bp ORF, as annotated in the LK932541 contig.  
237 A revised annotation of pCD630 has been submitted to ENA (AM180356) to reflect this.  
238 Though the pCD-ISS1 and pCD630 plasmids are co-linear, there is a single region that  
239 is divergent. The region of pCD630 encompassing the ORFs encoding CDP02 and  
240 CDP03 is absent from pCD-ISS1; the latter contains an ORF encoding a RNA  
241 polymerase sigma factor protein (Interpro:IPR013324) in this region. The pCD-ISS1  
242 annotation does not identify an ORF encoding a homolog of CDP05 of pCD630. This is  
243 the result of a 2bp deletion; it suggests that CDP05 (previously annotated as a doubtful  
244 CDS) may not be a true coding sequence. Both pCD630 and pCD-ISS1 encode phage-  
245 related functions. Most notably, CDP04 and its homolog encode a phage capsid protein  
246 with similarity to the HK97-like major capsid proteins of tailed phages of the  
247 Caudovirales order. Caudovirales are common *C. difficile* phages [37-40]. However,  
248 beside the phage capsid, pCD630 and pCD-ISS11 lack genes encoding other proteins  
249 required for virion formation, such as the large terminase subunit and the portal protein.

250 Therefore, it is highly unlikely that phage particles can be produced from these  
251 plasmids. In line with this, we find that the genes encoding the phage proteins are  
252 poorly, if at all, expressed (unpublished observations). It appears therefore that (part of)  
253 a viral genome has been incorporated into the plasmid, or that the viral genome has  
254 been transformed into a plasmid.

255 Together, these data suggest the existence of plasmids closely related to  
256 pCD630 in at least two different PCR ribotypes (010 and 012).

257

258 *pCD630-like plasmids can be identified in short reads from whole genome sequence*  
259 *projects*

260 Above, we showed the existence of at least one pCD630-like plasmid. We wondered if  
261 we could extend the family by interrogating the wealth of raw, non-annotated, sequence  
262 data in the public domain. We downloaded a selection of sequence reads from ENA,  
263 corresponding to 10 different strains (see Materials and Methods). To identify  
264 extrachromosomal replicons, we used graph-based tool for reconstruction of plasmids  
265 [23]. We validated this tool on our short read sequence data from our 630 $\Delta$ *erm*  
266 sequence (ERR609091)[26] and found that it readily identifies the pCD630 plasmid  
267 (data not shown).

268 Surprisingly, we found only two strains with a single replicon (i.e. only the  
269 chromosome). The other 8 analyzed datasets suggested the presence of at least one  
270 other replicon. Strikingly, 6 contained a replicon that shared similarity to pCD630. Of  
271 these, 4 could be circularized due to the presence of direct repeats at the ends of the  
272 contig and therefore likely represent complete plasmid sequences, as was the case for

273 pCD-ISS1 (**Table 3**). These plasmids - hereafter referred to as pCD-WTSI1, pCD-  
274 WTSI2, pCD-WTSI3 and pCD-WTSI4 – are all significantly larger than pCD630 and  
275 pCD-ISS1 (**Figure 2**). The smaller pCD630-like contigs without flanking repeats (that  
276 may represent either complete, or incomplete plasmids) were not further studied.

277 To gain further insight in the group of large pCD630-like plasmids, we performed  
278 an automated annotation of plasmids pCD-WTSI1 (GenBank: MG019959), pCD-WTSI2  
279 (GenBank: MG019960), pCD-WTSI3 (GenBank: MG019961) and pCD-WTSI4  
280 (GenBank: MG019962). The homology with the small pCD630-like plasmids is confined  
281 to the region encoding CDP6-CDP10 of pCD630. Within this region, it is noteworthy that  
282 the ORF encoding the Arc-type ribbon-helix-helix protein (Pfam: PF12651) CDP09 of  
283 pCD630 appears to be replaced with another putative DNA binding protein, a helix-turn-  
284 helix XRE protein (InterPro:IPR010982) in the pCD-WTSI group of plasmids. Further,  
285 we noted that the CDP06, that encodes a truncated homolog of CDP07, appears to be  
286 fused with CDP07 to form a hybrid protein nearly identical in size to CDP07. This  
287 suggests that the CDP06-07 arrangement may be the result of an (incomplete) gene  
288 duplication event. The proteins are putative superfamily 2 helicase fused to an N-  
289 terminal CHC2 zinc finger domain, with homology to the corresponding TOPRIM  
290 domain of DnaG-like primases. They also contains a third domain of unknown function  
291 C-terminal of the helicase domain.

292 The pCD-WTSI plasmids all contain a highly similar accessory module of ~8kb.  
293 Within this module, notable functions include an integrase (Pfam: PF00589), a  
294 recombinase (Pfam: PF00239), a Cro-C1-type HTH protein (Pfam: PF01381), a  
295 penicillinase repressor (Pfam: PF03965), and an RNA polymerase sigma factor (Pfam:

296 PF08281 & Pfam: PF04542). The combination is suggestive of integration of mobile  
297 genetic element(s) into the plasmid backbone.

298 In the short read archive, we only identified large pCD630-like plasmids so far.  
299 Though we cannot exclude the existence of more small pCD630-like plasmids, we  
300 consider it likely that the pCD-WTSI plasmids represent a more widely distributed form  
301 of the pCD630-like plasmid family.

302

303 *pCD630-like plasmids have a modular organization*

304 Above, we have identified 6 plasmids sharing significant homology in a region that  
305 encompasses an ORF encoding a putative helicase. Moreover, we have shown that the  
306 large and small pCD630-like plasmids are remarkably similar, but that certain genes  
307 appear to have been exchanged. Thus, the organization of these plasmids, like those of  
308 mobile elements in *C. difficile* [41, 42] and plasmids in other organisms [43], is modular.

309 None of the pCD630-like plasmids encodes a previously characterized replication  
310 protein; yet, it is clear that the plasmid is efficiently maintained in the absence of  
311 obvious selection (**Figure 1**). Based on the finding that all 6 plasmids contain homologs  
312 of the pCD630 CDP6-10, we propose that this region (or part of it) forms the replicon of  
313 the plasmids. The DEAD-DEAH family helicase CDP07 and its homologs, that also  
314 contain a CHC2 zinc finger domain (InterPro: IPR002694) that aligns with the  
315 corresponding domain in DnaG-like DNA primases, appear to be the most likely  
316 candidate to be the replication proteins for this family of plasmids. As noted above, in  
317 the large pCD630-like plasmids the helicase is a CDP06-7 hybrid protein; this may  
318 underlie the signals corresponding to these ORFs in microarray and comparative

319 genome hybridization studies, but also suggests that CDP06 itself is probably  
320 dispensable for plasmid maintenance. CDP09 is likely also not crucial for the function of  
321 the replicon, as it is replaced by another protein in the group of large pCD630-like  
322 proteins. It is conceivable that CDP09 and the HTH XTRE proteins serve a regulatory  
323 function for instance in controlling the copy number of the plasmids. The small pCD630-  
324 like plasmids have an estimated copy number of 4-5, based on average read coverage  
325 for chromosomal loci and the plasmid contigs. For the large plasmids, this is 9-10.  
326 Consistent with a regulatory rather than an essential function, we noted that in a  
327 previous microarray identification more strains appear to contain homologs of CDP6-10  
328 than any of the other pCD630 genes, and that several strains harboring CDP6-8 and  
329 CDP10 do not contain CDP09 [14]. The same study also found strains that carry  
330 homologs of CDP02-03, but not any of the other genes of pCD630. Combined with our  
331 observation that this particular region is replaced with a single ORF in pCD-ISS1,  
332 suggest that CDP02-03 have been horizontally acquired. In line with this notion, we  
333 found that CDP02 has homology to HNH endonucleases (PFAM01844.17), and genes  
334 encoding these homing endonucleases are considered as selfish genetic elements [44].  
335

### 336 *pCD630-like plasmids are common in diverse ribotypes*

337 The identification of 6 plasmids carrying a conserved putative replication module,  
338 allowed us to determine the most conserved regions within this module. We designed  
339 primers against one such region, to be able to identify pCD630-like plasmids by PCR.  
340 We tested these primers in a PCR reaction on chromosomal DNA from strains 630 $\Delta$ *erm*  
341 (WKS1241), yielding a positive signal (**Figure 3**). Next, we tested a collection of 43

342 strains of diverse PCR ribotypes to see if pCD630-like plasmids could be identified. We  
343 found DNA from 11 isolates gave a signal similar or greater than our positive control,  
344 630 $\Delta$ *erm* (32.6%); this includes strains of PCR ribotypes 012, 015, 017, and 081  
345 (**Figure 3**). Interestingly, strain 630 and derivatives are PCR ribotype 012 as well [7].  
346 Those samples that were weakly positive on total DNA, appear negative on  
347 PlasmidSafe DNase treated DNA and are therefore likely false positives. Alternatively,  
348 these could represent isolates in which the plasmid is integrated into the chromosome.  
349 Isolating and characterizing these plasmids is part of our ongoing work. We noted that  
350 strain EK29, that presumably contains a pCD630-like plasmid [15], appears negative in  
351 this PCR. We interpret this to mean that the PCR likely fails to detect certain pCD630-  
352 like plasmids, suggesting that the actual number of strain containing pCD630-like  
353 plasmids may be even higher. Our data suggests that pCD630-like plasmids are  
354 common, and not limited to PCR ribotype 010 (strain 7032985) and 012 (strains 630  
355 and derivatives).

356         The high prevalence of pCD630-like plasmids in these strains raises some  
357 interesting questions. There is little to no information on the function of these plasmids  
358 in *C. difficile* cells. The plasmids from the pCD630-family lack characterized  
359 determinants for antimicrobial resistance and are therefore unlikely to play a major role  
360 in drug resistance. Instead, they appear to harbor phage remnants or (partial) mobile  
361 genetic elements. It is documented that (pro)phages can modulate the expression of the  
362 major toxins [45, 46], affect the expression of cell wall proteins [47] and are up-  
363 regulated during infection [48]; a role in virulence of *C. difficile* is therefore certainly  
364 conceivable.



365 This study has only looked at plasmids of the pCD630 family and found that it  
366 occurs among diverse *C. difficile* strains. Based on our limited survey, we found  
367 plasmids in 5 different PCR ribotypes, and in strains of different toxinotypes (including  
368 both toxigenic and non-toxigenic strains). It will be of interest to see if the pCD630-  
369 family of plasmids is the most common, or that other plasmids are equally widely  
370 distributed. A broad survey of available genome sequences will likely reveal other  
371 families of plasmids and some of these may be limited to specific strains or clades of *C.*  
372 *difficile*.

373 The distribution of pCD630-like plasmids suggests that this family was acquired  
374 early during the evolution of *C. difficile*, or that the plasmid is capable of horizontal  
375 transfer. The pCD630-like plasmids do not encode any characterized conjugation  
376 proteins (**Figure 2**); however, they might be transferable dependent on other mobile  
377 elements or conjugative plasmids. Of note in this respect is that the mobile element  
378 ICEBs1 (which is related to Tn916, a conjugative transposon common in *C. difficile*) can  
379 mobilize plasmids [49], the pathogenicity locus of *C. difficile* can get transferred by a so  
380 far unidentified mechanism likely to rely on integrated conjugative elements [50] and in  
381 archaea vesicle-mediated plasmid transfer has been documented [51].

382 We found that pCD630-like plasmids are compatible with different replicons  
383 (**Figure 1C**). To our knowledge, no plasmid incompatibility has been described for *C.*  
384 *difficile* and sequence analysis did not reveal clear candidate genes for an  
385 incompatibility system in the plasmids analyzed. Considering the high plasmid  
386 prevalence (**Figure 3**), and the fact that existing genetic tools for *C. difficile* depend on  
387 the conjugative transfer of shuttle plasmids with a pCB102 or pCD6 replicon [5], one

388 can wonder whether some strains are refractory to genetic manipulation due to the  
389 presence of plasmids from an incompatible plasmid group.

390

## 391 **Conclusions**

392 In this study we showed that plasmid pCD630 from strain 630 is the paradigm of a  
393 family of plasmids that is defined by a module that encodes a conserved helicase. Most  
394 of the family members belong to a group that is larger than pCD630, and that differ in  
395 their accessory module. Plasmids from the pCD630-family are present in diverse *C.*  
396 *difficile* strains. Our data warrant further investigation of the role of pCD630-like  
397 plasmids – and plasmids in general - in *C. difficile* biology.

398

399

## 400 **Acknowledgements**

401 The following people are acknowledged for helpful discussions: Y. Anvar, W. Meijer, M.  
402 Krupovic and the Experimental Bacteriology laboratory of E.J. Kuijper at the LUMC. We  
403 thank the Wellcome Trust Sanger Institute for sharing unpublished raw data that was  
404 used in this work via the European Nucleotide Archive. The European Nucleotide  
405 Archive support desk is acknowledged for updating the AM180356 record to reflect the  
406 findings of this study. This work was supported by the Netherlands Organisation for  
407 Scientific Research [VIDI 016.141.310] and Departmental Funds to W.K.S.

408

## 409 References

- 410 [1] P.A. Lawson, D.M. Citron, K.L. Tyrrell, S.M. Finegold. Reclassification of *Clostridium*  
411 *difficile* as *Clostridioides difficile* (Hall and O'Toole 1935) Prevot 1938. *Anaerobe* 40 (2016) 95-9.
- 412 [2] W.K. Smits, D. Lyras, D.B. Lacy, M.H. Wilcox, E.J. Kuijper. *Clostridium difficile* infection.  
413 *Nat Rev Dis Primers* 2 (2016) 16020.
- 414 [3] C.M. Theriot, A.A. Bowman, V.B. Young. Antibiotic-Induced Alterations of the Gut  
415 Microbiota Alter Secondary Bile Acid Production and Allow for *Clostridium difficile* Spore  
416 Germination and Outgrowth in the Large Intestine. *mSphere* 1 (2016).
- 417 [4] K. Aktories, C. Schwan, T. Jank. *Clostridium difficile* Toxin Biology. *Annu Rev Microbiol*  
418 (2017).
- 419 [5] N. Minton, G. Carter, M. Herbert, T. O'Keeffe, D. Purdy, M. Elmore, et al. The  
420 development of *Clostridium difficile* genetic systems. *Anaerobe* 10 (2004) 75-84.
- 421 [6] D. Purdy, T.A. O'Keeffe, M. Elmore, M. Herbert, A. McLeod, M. Bokori-Brown, et al.  
422 Conjugative transfer of clostridial shuttle vectors from *Escherichia coli* to *Clostridium difficile*  
423 through circumvention of the restriction barrier. *Mol Microbiol* 46 (2002) 439-52.
- 424 [7] M. Sebahia, B.W. Wren, P. Mullany, N.F. Fairweather, N. Minton, R. Stabler, et al. The  
425 multidrug-resistant human pathogen *Clostridium difficile* has a highly mobile, mosaic genome.  
426 *Nat Genet* 38 (2006) 779-86.
- 427 [8] M. He, F. Miyajima, P. Roberts, L. Ellison, D.J. Pickard, M.J. Martin, et al. Emergence  
428 and global spread of epidemic healthcare-associated *Clostridium difficile*. *Nat Genet* 45 (2013)  
429 109-13.
- 430 [9] N. Kumar, F. Miyajima, M. He, P. Roberts, A. Swale, L. Ellison, et al. Genome-Based  
431 Infection Tracking Reveals Dynamics of *Clostridium difficile* Transmission and Disease  
432 Recurrence. *Clin Infect Dis* 62 (2016) 746-52.
- 433 [10] D.W. Eyre, M.L. Cule, D.J. Wilson, D. Griffiths, A. Vaughan, L. O'Connor, et al. Diverse  
434 sources of *C. difficile* infection identified on whole-genome sequencing. *N Engl J Med* 369  
435 (2013) 1195-205.
- 436 [11] X. Didelot, D.W. Eyre, M. Cule, C.L. Ip, M.A. Ansari, D. Griffiths, et al. Microevolutionary  
437 analysis of *Clostridium difficile* genomes to investigate transmission. *Genome Biol* 13 (2012)  
438 R118.
- 439 [12] C.W. Knetsch, T.D. Lawley, M.P. Hensgens, J. Corver, M.W. Wilcox, E.J. Kuijper.  
440 Current application and future perspectives of molecular typing methods to study *Clostridium*  
441 *difficile* infections. *Euro Surveill* 18 (2013) 20381.
- 442 [13] C. Clabots, S. Lee, D. Gerding, M. Mulligan, R. Kwok, D. Schaberg, et al. *Clostridium*  
443 *difficile* plasmid isolation as an epidemiologic tool. *Eur J Clin Microbiol Infect Dis* 7 (1988) 312-5.
- 444 [14] T. Janvilisri, J. Scaria, A.D. Thompson, A. Nicholson, B.M. Limbago, L.G. Arroyo, et al.  
445 Microarray identification of *Clostridium difficile* core components and divergent regions  
446 associated with host origin. *J Bacteriol* 191 (2009) 3881-91.
- 447 [15] G.L. Marsden, I.J. Davis, V.J. Wright, M. Sebahia, E.J. Kuijper, N.P. Minton. Array  
448 comparative hybridisation reveals a high degree of similarity between UK and European clinical  
449 isolates of hypervirulent *Clostridium difficile*. *BMC Genomics* 11 (2010) 389.
- 450 [16] W.N. Fawley, C.W. Knetsch, D.R. MacCannell, C. Harmanus, T. Du, M.R. Mulvey, et al.  
451 Development and validation of an internationally-standardized, high-resolution capillary gel-  
452 based electrophoresis PCR-ribotyping protocol for *Clostridium difficile*. *PLoS One* 10 (2015)  
453 e0118150.
- 454 [17] D. Hyatt, G.L. Chen, P.F. Locascio, M.L. Land, F.W. Larimer, L.J. Hauser. Prodigal:  
455 prokaryotic gene recognition and translation initiation site identification. *BMC Bioinformatics* 11  
456 (2010) 119.

- 457 [18] K. Lagesen, P. Hallin, E.A. Rodland, H.H. Staerfeldt, T. Rognes, D.W. Ussery.  
458 RNAmmer: consistent and rapid annotation of ribosomal RNA genes. *Nucleic Acids Res* 35  
459 (2007) 3100-8.
- 460 [19] D. Laslett, B. Canback. ARAGORN, a program to detect tRNA genes and tmRNA genes  
461 in nucleotide sequences. *Nucleic Acids Res* 32 (2004) 11-6.
- 462 [20] C. Bland, T.L. Ramsey, F. Sabree, M. Lowe, K. Brown, N.C. Kyrpides, et al. CRISPR  
463 recognition tool (CRT): a tool for automatic detection of clustered regularly interspaced  
464 palindromic repeats. *BMC Bioinformatics* 8 (2007) 209.
- 465 [21] Y. Yin, X. Mao, J. Yang, X. Chen, F. Mao, Y. Xu. dbCAN: a web resource for automated  
466 carbohydrate-active enzyme annotation. *Nucleic Acids Res* 40 (2012) W445-51.
- 467 [22] C. Claudel-Renard, C. Chevalet, T. Faraut, D. Kahn. Enzyme-specific profiles for  
468 genome annotation: PRIAM. *Nucleic Acids Res* 31 (2003) 6633-9.
- 469 [23] L. Vielva, M. de Toro, V.F. Laza, F. de la Cruz. PLACNETw: a web-based tool for  
470 plasmid reconstruction from bacterial genomes. *Bioinformatics* btx462 (2017) 1-3.
- 471 [24] S.F. Altschul, W. Gish, W. Miller, E.W. Myers, D.J. Lipman. Basic local alignment search  
472 tool. *J Mol Biol* 215 (1990) 403-10.
- 473 [25] W.K. Smits. SNP-ing out the differences: Investigating differences between *Clostridium*  
474 *difficile* lab strains. *Virulence* (2016) 1-5.
- 475 [26] E. van Eijk, S.Y. Anvar, H.P. Browne, W.Y. Leung, J. Frank, A.M. Schmitz, et al.  
476 Complete genome sequence of the *Clostridium difficile* laboratory strain 630Deltaerm reveals  
477 differences from strain 630, including translocation of the mobile element CTn5. *BMC Genomics*  
478 16 (2015) 31.
- 479 [27] H. Dannheim, T. Riedel, M. Neumann-Schaal, B. Bunk, I. Schober, C. Sproer, et al.  
480 Manual curation and reannotation of the genomes of *Clostridium difficile* 630Deltaerm and *C.*  
481 *difficile* 630. *J Med Microbiol* 66 (2017) 286-93.
- 482 [28] M.M. Collery, S.A. Kuehne, S.M. McBride, M.L. Kelly, M. Monot, A. Cockayne, et al.  
483 What's a SNP between friends: The influence of single nucleotide polymorphisms on virulence  
484 and phenotypes of *Clostridium difficile* strain 630 and derivatives. *Virulence* (2016) 1-15.
- 485 [29] T. Riedel, D. Wetzels, J.D. Hofmann, S. Plorin, H. Dannheim, M. Berges, et al. High  
486 metabolic versatility of different toxigenic and non-toxigenic *Clostridioides difficile* isolates. *Int J*  
487 *Med Microbiol* 307 (2017) 311-20.
- 488 [30] J.T. Heap, S.T. Cartman, S.A. Kuehne, C. Cooksley, N.P. Minton. ClosTron-targeted  
489 mutagenesis. *Methods Mol Biol* 646 (2010) 165-82.
- 490 [31] D. Bakker, A.M. Buckley, A. de Jong, V.J. van Winden, J.P. Verhoeks, O.P. Kuipers, et  
491 al. The HtrA-like protease CD3284 modulates virulence of *Clostridium difficile*. *Infect Immun* 82  
492 (2014) 4222-32.
- 493 [32] S.T. Cartman, M.L. Kelly, D. Heeg, J.T. Heap, N.P. Minton. Precise manipulation of the  
494 *Clostridium difficile* chromosome reveals a lack of association between the *tcdC* genotype and  
495 toxin production. *Appl Environ Microbiol* 78 (2012) 4683-90.
- 496 [33] P.T. van Leeuwen, J.M. van der Peet, F.J. Bikker, M.A. Hoogenkamp, A.M. Oliveira  
497 Paiva, S. Kostidis, et al. Interspecies Interactions between *Clostridium difficile* and *Candida*  
498 *albicans*. *mSphere* 1 (2016).
- 499 [34] R.P. Fagan, N.F. Fairweather. *Clostridium difficile* has two parallel and essential Sec  
500 secretion systems. *J Biol Chem* 286 (2011) 27483-93.
- 501 [35] A.M. Oliveira Paiva, A.H. Friggen, S. Hossein-Javaheri, W.K. Smits. The Signal  
502 Sequence of the Abundant Extracellular Metalloprotease PPEP-1 Can Be Used to Secrete  
503 Synthetic Reporter Proteins in *Clostridium difficile*. *ACS Synth Biol* 5 (2016) 1376-82.
- 504 [36] I. Moura, M. Monot, C. Tani, P. Spigaglia, F. Barbanti, N. Norais, et al. Multidisciplinary  
505 analysis of a nontoxigenic *Clostridium difficile* strain with stable resistance to metronidazole.  
506 *Antimicrob Agents Chemother* 58 (2014) 4957-60.

- 507 [37] K.R. Hargreaves, M.R. Clokie. A Taxonomic Review of *Clostridium difficile* Phages and  
508 Proposal of a Novel Genus, "Phimmp04likevirus". *Viruses* 7 (2015) 2534-41.
- 509 [38] K.R. Hargreaves, M.R. Clokie. *Clostridium difficile* phages: still difficult? *Front Microbiol* 5  
510 (2014) 184.
- 511 [39] O. Sekulovic, L.C. Fortier. Characterization of Functional Prophages in *Clostridium*  
512 *difficile*. *Methods Mol Biol* 1476 (2016) 143-65.
- 513 [40] O. Sekulovic, J.R. Garneau, A. Neron, L.C. Fortier. Characterization of temperate  
514 phages infecting *Clostridium difficile* isolates of human and animal origins. *Appl Environ*  
515 *Microbiol* 80 (2014) 2555-63.
- 516 [41] M.S. Brouwer, A.P. Roberts, P. Mullany, E. Allan. In silico analysis of sequenced strains  
517 of *Clostridium difficile* reveals a related set of conjugative transposons carrying a variety of  
518 accessory genes. *Mob Genet Elements* 2 (2012) 8-12.
- 519 [42] M.S. Brouwer, P.J. Warburton, A.P. Roberts, P. Mullany, E. Allan. Genetic organisation,  
520 mobility and predicted functions of genes on integrated, mobile genetic elements in sequenced  
521 strains of *Clostridium difficile*. *PLoS One* 6 (2011) e23014.
- 522 [43] R. Fernandez-Lopez, M.P. Garcillan-Barcia, C. Revilla, M. Lazaro, L. Vielva, F. de la  
523 Cruz. Dynamics of the IncW genetic backbone imply general trends in conjugative plasmid  
524 evolution. *FEMS Microbiol Rev* 30 (2006) 942-66.
- 525 [44] D.R. Edgell. Selfish DNA: homing endonucleases find a home. *Curr Biol* 19 (2009)  
526 R115-7.
- 527 [45] R. Govind, G. Vedyappan, R.D. Rolfe, B. Dupuy, J.A. Fralick. Bacteriophage-mediated  
528 toxin gene regulation in *Clostridium difficile*. *J Virol* 83 (2009) 12037-45.
- 529 [46] O. Sekulovic, M. Meessen-Pinard, L.C. Fortier. Prophage-stimulated toxin production in  
530 *Clostridium difficile* NAP1/027 lysogens. *J Bacteriol* 193 (2011) 2726-34.
- 531 [47] O. Sekulovic, L.C. Fortier. Global transcriptional response of *Clostridium difficile* carrying  
532 the CD38 prophage. *Appl Environ Microbiol* 81 (2015) 1364-74.
- 533 [48] M. Meessen-Pinard, O. Sekulovic, L.C. Fortier. Evidence of in vivo prophage induction  
534 during *Clostridium difficile* infection. *Appl Environ Microbiol* 78 (2012) 7662-70.
- 535 [49] C.A. Lee, J. Thomas, A.D. Grossman. The *Bacillus subtilis* conjugative transposon  
536 ICEBs1 mobilizes plasmids lacking dedicated mobilization functions. *J Bacteriol* 194 (2012)  
537 3165-72.
- 538 [50] M.S. Brouwer, A.P. Roberts, H. Hussain, R.J. Williams, E. Allan, P. Mullany. Horizontal  
539 gene transfer converts non-toxigenic *Clostridium difficile* strains into toxin producers. *Nat*  
540 *Commun* 4 (2013) 2601.
- 541 [51] S. Erdmann, B. Tschitschko, L. Zhong, M.J. Raftery, R. Cavicchioli. A plasmid from an  
542 Antarctic haloarchaeon uses specialized membrane vesicles to disseminate and infect plasmid-  
543 free cells. *Nat Microbiol* (2017).
- 544 [52] J.R. O'Connor, D. Lyras, K.A. Farrow, V. Adams, D.R. Powell, J. Hinds, et al.  
545 Construction and analysis of chromosomal *Clostridium difficile* mutants. *Mol Microbiol* 61 (2006)  
546 1335-51.
- 547 [53] H.A. Hussain, A.P. Roberts, P. Mullany. Generation of an erythromycin-sensitive  
548 derivative of *Clostridium difficile* strain 630 (630Deltaerm) and demonstration that the  
549 conjugative transposon Tn916DeltaE enters the genome of this strain at multiple sites. *J Med*  
550 *Microbiol* 54 (2005) 137-41.
- 551 [54] L.J. Deakin, S. Clare, R.P. Fagan, L.F. Dawson, D.J. Pickard, M.R. West, et al. The  
552 *Clostridium difficile* spo0A gene is a persistence and transmission factor. *Infect Immun* 80  
553 (2012) 2704-11.
- 554 [55] K.E. Rosenbusch, D. Bakker, E.J. Kuijper, W.K. Smits. *C. difficile* 630Deltaerm Spo0A  
555 regulates sporulation, but does not contribute to toxin production, by direct high-affinity binding  
556 to target DNA. *PLoS One* 7 (2012) e48608.

557 [56] T. Riedel, B. Bunk, A. Thurmer, C. Sproer, E. Brzuszkiewicz, B. Abt, et al. Genome  
558 Resequencing of the Virulent and Multidrug-Resistant Reference Strain *Clostridium difficile* 630.  
559 Genome Announc 3 (2015).  
560

561

562 **Figure Legends**

563 **Figure 1. 630 and derivatives can contain pCD630. A.** *C. difficile* 630 $\Delta$ erm [26]

564 contains the pCD630 plasmid. **B.** Some, but not all, 630-derived strains contain

565 pCD630. I=ISS D=DSMZ L=LUMC U=UCL [26]. **C.** Genetically modified 630 $\Delta$ erm

566 strains still contain pCD630. wt = wild type, CT = Clostron mutant [30, 31], ACE = allelic

567 coupled exchange mutant [32, 33], p = containing a replicative plasmid [34, 35]. **D.**

568 Strain 7032985 (intermediate metronidazole susceptible; I) contains a pCD630-like

569 plasmid but strains 7032994 (metronidazole susceptible; S) and 7032989

570 (metronidazole resistant; R) do not. For oligonucleotides used, see Materials and

571 Methods. M = marker.

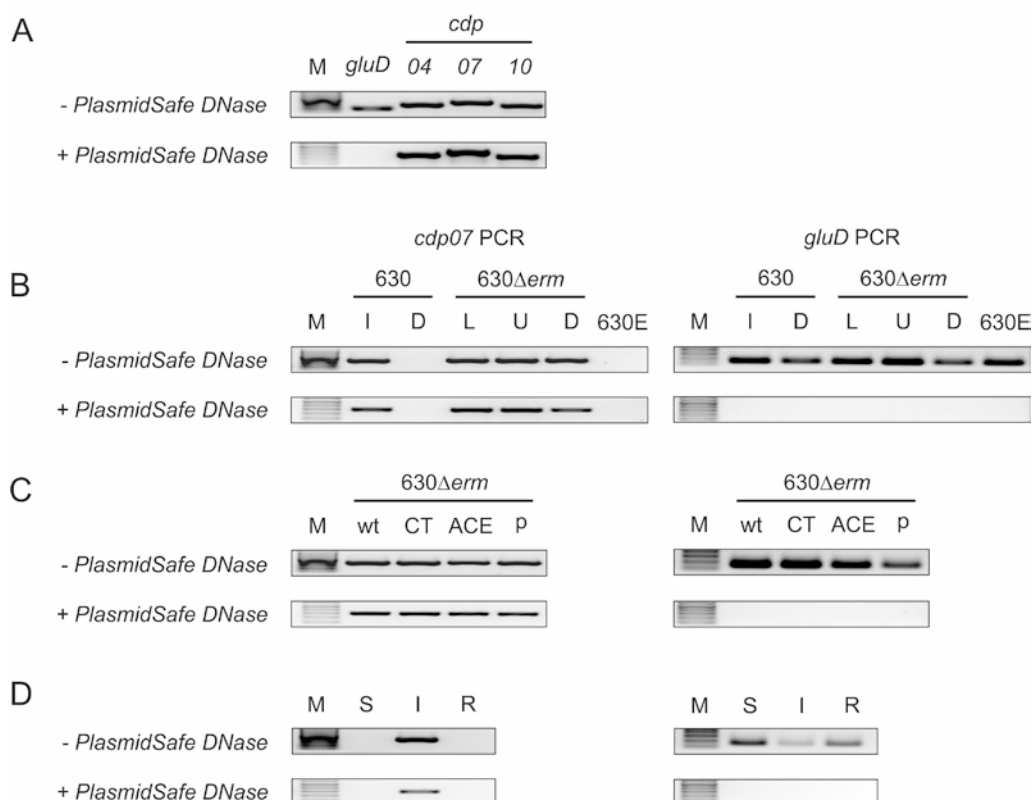

572

573

574

575 **Figure 2. Schematic representation of an alignment of pCD630-like plasmids.** Full-  
576 length plasmids identified in this study were aligned. pCD-ISS1 is based on  
577 GenBank:LK932541. pCD-WTSI-1 to pCD-WTSI4 are based on short read sequences  
578 from ENA:PRJEB2101. The most striking differences are indicated with differently  
579 colored ORFs. The conserved module encompassing the gene encoding a helicase is  
580 boxed, the accessory module is indicated with black ORFs. The gray outline of CDP05  
581 indicates it is annotated in AM180356.1 but is not predicted in our analysis.

582

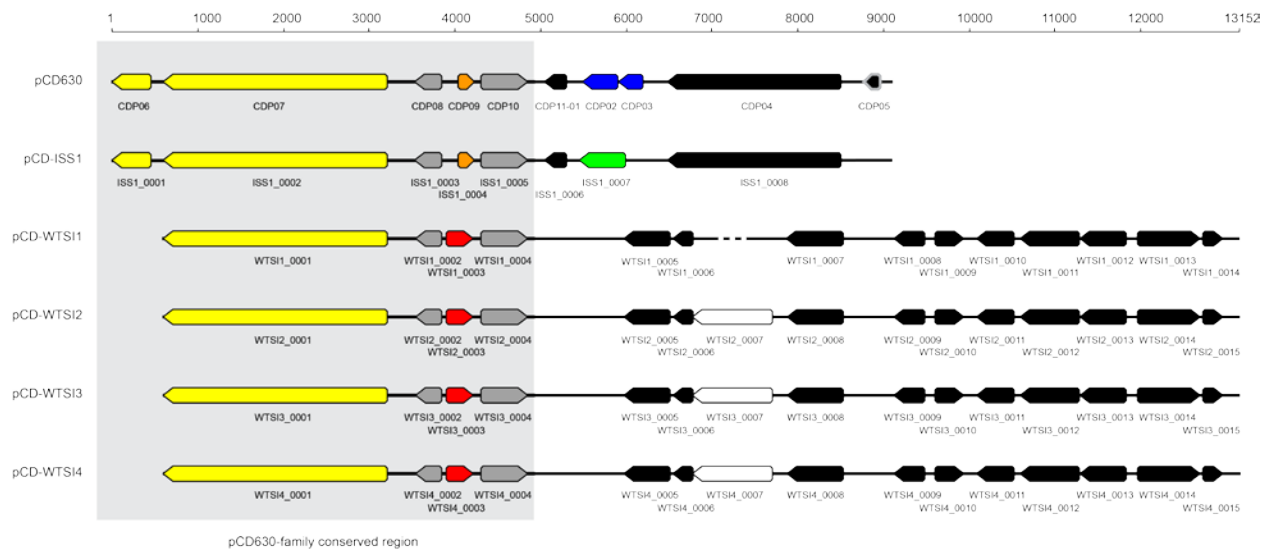

583

584

585

586

587

588

589

590

591



592 **Figure 3. pCD630-like plasmids are present in diverse *C. difficile* strains.** A PCR  
593 was performed against a conserved target region in the putative helicase protein using  
594 oWKS-1651 and oWKS-1652. The presence of a pCD630-like plasmid results in a  
595 positive signal in this PCR. M = marker, EK = EK29 [15],  $\Delta erm = 630\Delta erm$  [26].

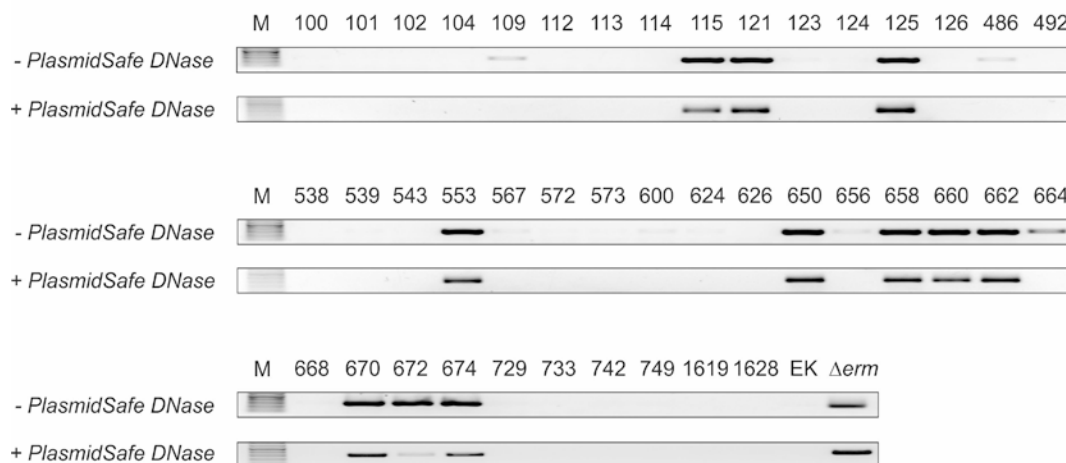

596

597

598 **Tables.**

599

600 **Table 1. Strains used in this study.**

601

| Strain                         | Labstock | PCR ribotype | References                          |
|--------------------------------|----------|--------------|-------------------------------------|
| 630 (ISS)                      | WKS1705  | 012          | P. Mastrantonio lab collection; [7] |
| 630E                           | WKS1706  | 012          | R. Britton lab collection; [52]     |
| 630 $\Delta$ <i>erm</i> (LUMC) | WKS1241  | 012          | [26, 53]                            |
| 630 $\Delta$ <i>erm</i> (UCL)  | WKS1707  | 012          | [53]                                |
| spo0A::CT                      | WKS1242  | 012          | [54, 55]                            |
| pAP24                          | AP34     | 012          | [35]                                |
| $\Delta$ <i>hpd</i>            | AP58     | 012          | [33]                                |
| DSMZ27543                      | WKS1941  | 012          | [7, 27, 56]                         |
| DSMZ28645                      | WKS1943  | 012          | [27, 53]                            |
| EK29                           | WKS1914  | 078          | [15]                                |
| 7032994                        | WKS1935  | 010          | P. Spigaglia lab collection; [36]   |
| 7032985                        | WKS1937  | 010          | P. Spigaglia lab collection; [36]   |
| 7032989                        | WKS1939  | 010          | P. Spigaglia lab collection; [36]   |
| 100                            | WKS1950  | 002          | J.S. Weese lab collection           |
| 101                            | WKS1951  | 258          | J.S. Weese lab collection; [14]     |
| 102                            | WKS1952  | 002          | J.S. Weese lab collection           |
| 104                            | WKS1953  | 137          | J.S. Weese lab collection; [14]     |
| 109                            | WKS1954  | 085          | J.S. Weese lab collection; [14]     |
| 112                            | WKS1955  | 009          | J.S. Weese lab collection; [14]     |
| 113                            | WKS1956  | 002          | J.S. Weese lab collection; [14]     |
| 114                            | WKS1957  | 015          | J.S. Weese lab collection; [14]     |
| 115                            | WKS1958  | 015          | J.S. Weese lab collection; [14]     |
| 121                            | WKS1959  | 001          | J.S. Weese lab collection; [14]     |
| 123                            | WKS1960  | 039          | J.S. Weese lab collection; [14]     |
| 124                            | WKS1961  | 002          | J.S. Weese lab collection; [14]     |
| 125                            | WKS1962  | 081          | J.S. Weese lab collection; [14]     |
| 126                            | WKS1963  | 010          | J.S. Weese lab collection           |
| 486                            | WKS1964  | Unknown      | J.S. Weese lab collection           |
| 492                            | WKS1965  | 719          | J.S. Weese lab collection           |
| 538                            | WKS1967  | 009          | J.S. Weese lab collection; [14]     |
| 539                            | WKS1968  | 017          | J.S. Weese lab collection           |
| 543                            | WKS1969  | 009          | J.S. Weese lab collection           |

|      |         |         |                                 |
|------|---------|---------|---------------------------------|
| 553  | WKS1970 | 015     | J.S. Weese lab collection       |
| 567  | WKS1971 | 020     | J.S. Weese lab collection       |
| 572  | WKS1972 | 027     | J.S. Weese lab collection       |
| 573  | WKS1973 | 001     | J.S. Weese lab collection       |
| 600  | WKS1974 | 137     | J.S. Weese lab collection       |
| 624  | WKS1975 | 001     | J.S. Weese lab collection       |
| 626  | WKS1976 | 046     | J.S. Weese lab collection       |
| 650  | WKS1977 | 012     | J.S. Weese lab collection       |
| 656  | WKS1978 | 017     | J.S. Weese lab collection; [14] |
| 658  | WKS1979 | 012     | J.S. Weese lab collection; [14] |
| 660  | WKS1980 | 012     | J.S. Weese lab collection; [14] |
| 662  | WKS1981 | 012     | J.S. Weese lab collection; [14] |
| 664  | WKS1982 | 017     | J.S. Weese lab collection; [14] |
| 668  | WKS1983 | 012     | J.S. Weese lab collection; [14] |
| 670  | WKS1984 | 012     | J.S. Weese lab collection; [14] |
| 672  | WKS1985 | 012     | J.S. Weese lab collection; [14] |
| 674  | WKS1986 | 012     | J.S. Weese lab collection; [14] |
| 729  | WKS1987 | 078     | J.S. Weese lab collection       |
| 733  | WKS1988 | 288     | J.S. Weese lab collection       |
| 742  | WKS1989 | Unknown | J.S. Weese lab collection       |
| 749  | WKS1990 | 001     | J.S. Weese lab collection       |
| 1619 | WKS1991 | Unknown | J.S. Weese lab collection       |
| 1628 | WKS1992 | Unknown | J.S. Weese lab collection       |

602

603

604 **Table 2. Oligonucleotides used in this study.**

| Name      | Sequence (5' > 3')        | Target                                                                 |
|-----------|---------------------------|------------------------------------------------------------------------|
| oWKS-1070 | GTCTTGGATGGTTGATGAGTAC    | Forward primer on <i>gluD</i>                                          |
| oWKS-1071 | TTCCTAATTTAGCAGCAGCTTC    | Reverse primer on <i>gluD</i>                                          |
| oWKS-1629 | CTCGAGCGAATGCAAGAG        | Forward primer on <i>cdp04</i>                                         |
| oWKS-1630 | CCAGTCACCTATGTGCATACC     | Reverse primer on <i>cdp04</i>                                         |
| oWKS-1631 | ACCTACACAGATGCGTTCAG      | Forward primer on <i>cdp07</i>                                         |
| oWKS-1632 | AAAGCACCTCATAGCCTTCC      | Reverse primer on <i>cdp07</i>                                         |
| oWKS-1633 | AAAGTAGTTACGGGCGACAC      | Forward primer on <i>cdp10</i>                                         |
| oWKS-1634 | TCACAGAAGGCTGCAAATC       | Reverse primer on <i>cdp10</i>                                         |
| oWKS-1651 | TAGTCTACCTCTGCACTTATTAG   | Forward primer on pCD630-like helicase genes (including <i>cdp07</i> ) |
| oWKS-1652 | CATTAAAAGAGCTGGATATAAAAGC | Reverse primer on pCD630-like helicase genes (including <i>cdp07</i> ) |

605

606

607 **Table 3. Full length pCD630-like plasmids.**

| <b>Name</b> | <b>Source</b>  | <b>Accessions</b>                                         | <b>Size</b> | <b>Reference</b> |
|-------------|----------------|-----------------------------------------------------------|-------------|------------------|
| pCD630      | Strain 630     | GenBank: AM180356                                         | 7881 bp     | [7]; this study  |
| pCD-ISS1    | Strain 7032985 | GenBank: LK932541 (contig)<br>GenBank: MG266000 (plasmid) | 7991 bp     | [36]; this study |
| pCD-WTSI1   | Not specified  | ENA: ERR017368 (Illumina reads)<br>GenBank: MG019959      | 11777 bp    | This study       |
| pCD-WTSI2   | Not specified  | ENA:ERR022513 (Illumina reads)<br>GenBank: MG019960       | 12526 bp    | This study       |
| pCD-WTSI3   | Not specified  | ENA: ERR125910 (Illumina reads)<br>GenBank: MG019961      | 12525 bp    | This study       |
| pCD-WTSI4   | Not specified  | ENA: ERR125911 (Illumina reads)<br>GenBank: MG019962      | 12488 bp    | This study       |

608
